# Supplementary material
Source: PubMed Central journal article supplement (PMC6601354)
Supplement: NIHMS1036867-supplement-Table_S7.pdf [file NIHMS1036867-supplement-Table_S7.pdf]

**TABLE S7**

| <b>Target Name</b>      | <b>Primer Sequence</b>  |
|-------------------------|-------------------------|
| USP9Y-TTTY15-in-F       | CGTATGGAGCCAAGAAAGCC    |
| USP9Y-TTTY15-in-R       | CTGTCGTTCCCTCCTACTGG    |
| USP9Y-TTTY15-circ-out-F | CAGTAGGAGGGAACGACAGC    |
| USP9Y-TTTY15-circ-out-R | CCAGTTTTTCCAAGGGCTTT    |
| USP9Y-li-F              | AGCCAGATGACCAGGATGC     |
| USP9Y-li-R              | TTCTTGTGTTTCGTTGGCCTG   |
| TTY15-li-F              | GCGCCATATTGAAGAGGACG    |
| TTY15-li-R              | AGACACTCCTATCTCCCGGT    |
| GAPDH-li-F              | CCATCACCATCTTCCAGGAGCGA |
| GAPDH-li-R              | GGTGGTGAAGACGCCAGTGA    |
| RHOBTB3-circ-F          | TCAGTGGGAAGAATTGGAAGA   |
| RHOBTB3-circ-R          | ACACACTGGCAGCAGAACAG    |
| RHOBTB3-li-F            | TGAACTCCACAGCCTTGATG    |
| RHOBTB3-li-R            | TCCATGAAAGGAGTTGCTCA    |
| ARID1A-circ-F           | CCCCTCAATGACCTCCAGTA    |
| ARID1A-circ-R           | GTCCCTGTTGCTGCGAGTAT    |
| ARID1A-li-F             | CATGGCAGAAGGAGGAGACT    |
| ARID1A-li-R             | GAGTCATGGAATTCCGCTTC    |
| HIPK2-circ-F            | TTATCCACGCTGACCTCAA     |
| HIPK2-circ-R            | TGAGGGGAGAAAACCTTGAC    |
| HIPK2-li-F              | GACGAGGAGGAGGAACAGAA    |
| HIPK2-li-R              | GAGTCGGAGTAGGGGGAGTC    |
| FAM13B-circ-F           | GACTGTTCAAACCTGTGGCTA   |
| FAM13B-circ-R           | AGAGGCTGGTAGGATGCTGA    |
| FAM13B-li-F             | GCAAATTCTTTGGCTGCTGT    |
| FAM13B-li-R             | TTTCCAGAAGTCCAGCCATT    |
| CAMSAP1-circ-F          | ACGTTTCAGTGCCTCGAAAGA   |
| CAMSAP1-circ-R          | GCTGGACAGGAGAAGCTTGA    |
| CAMSAP1-li-F            | ATCTTCCCTGGCCTCAGTG     |
| CAMSAP1-li-R            | CTTGTGGGGTTTCGTTCACTT   |
| LDLRAD3-circ-F          | CAGAATGCGTCGGAAGTAGG    |
| LDLRAD3-circ-R          | CACCACCAGCACAAAATGA     |
| LDLRAD3-li-F            | GCAGAATGCGTCGGAAGTAG    |
| LDLRAD3-li-R            | TCGGCTTGGTTCAGAGATTC    |
| MAN1A2-circ-F           | GGAGGCCTACTTGCAGCATA    |
| MAN1A2-circ-R           | TGCTCGAATTTCTCTCTTGA    |
| MAN1A2-li-F             | GCATTCTGGCTGAATTTGGT    |
| MAN1A2-li-R             | CCATTTGGACGATCCATTTT    |
| AURKA-circ-F            | TCCATGATGCTACCAGAGTCT   |
| AURKA-circ-R            | GGAATGCGCTGGGAAGAATT    |
| AURKA-li-F              | GCAACCAGTGACCTCATCCTG   |
| AURKA-li-R              | AAGTCTTCAAAGCCCACTGCC   |
