# Supplementary material
Source: PubMed Central journal article supplement (PMC6601354)

# Figure S1

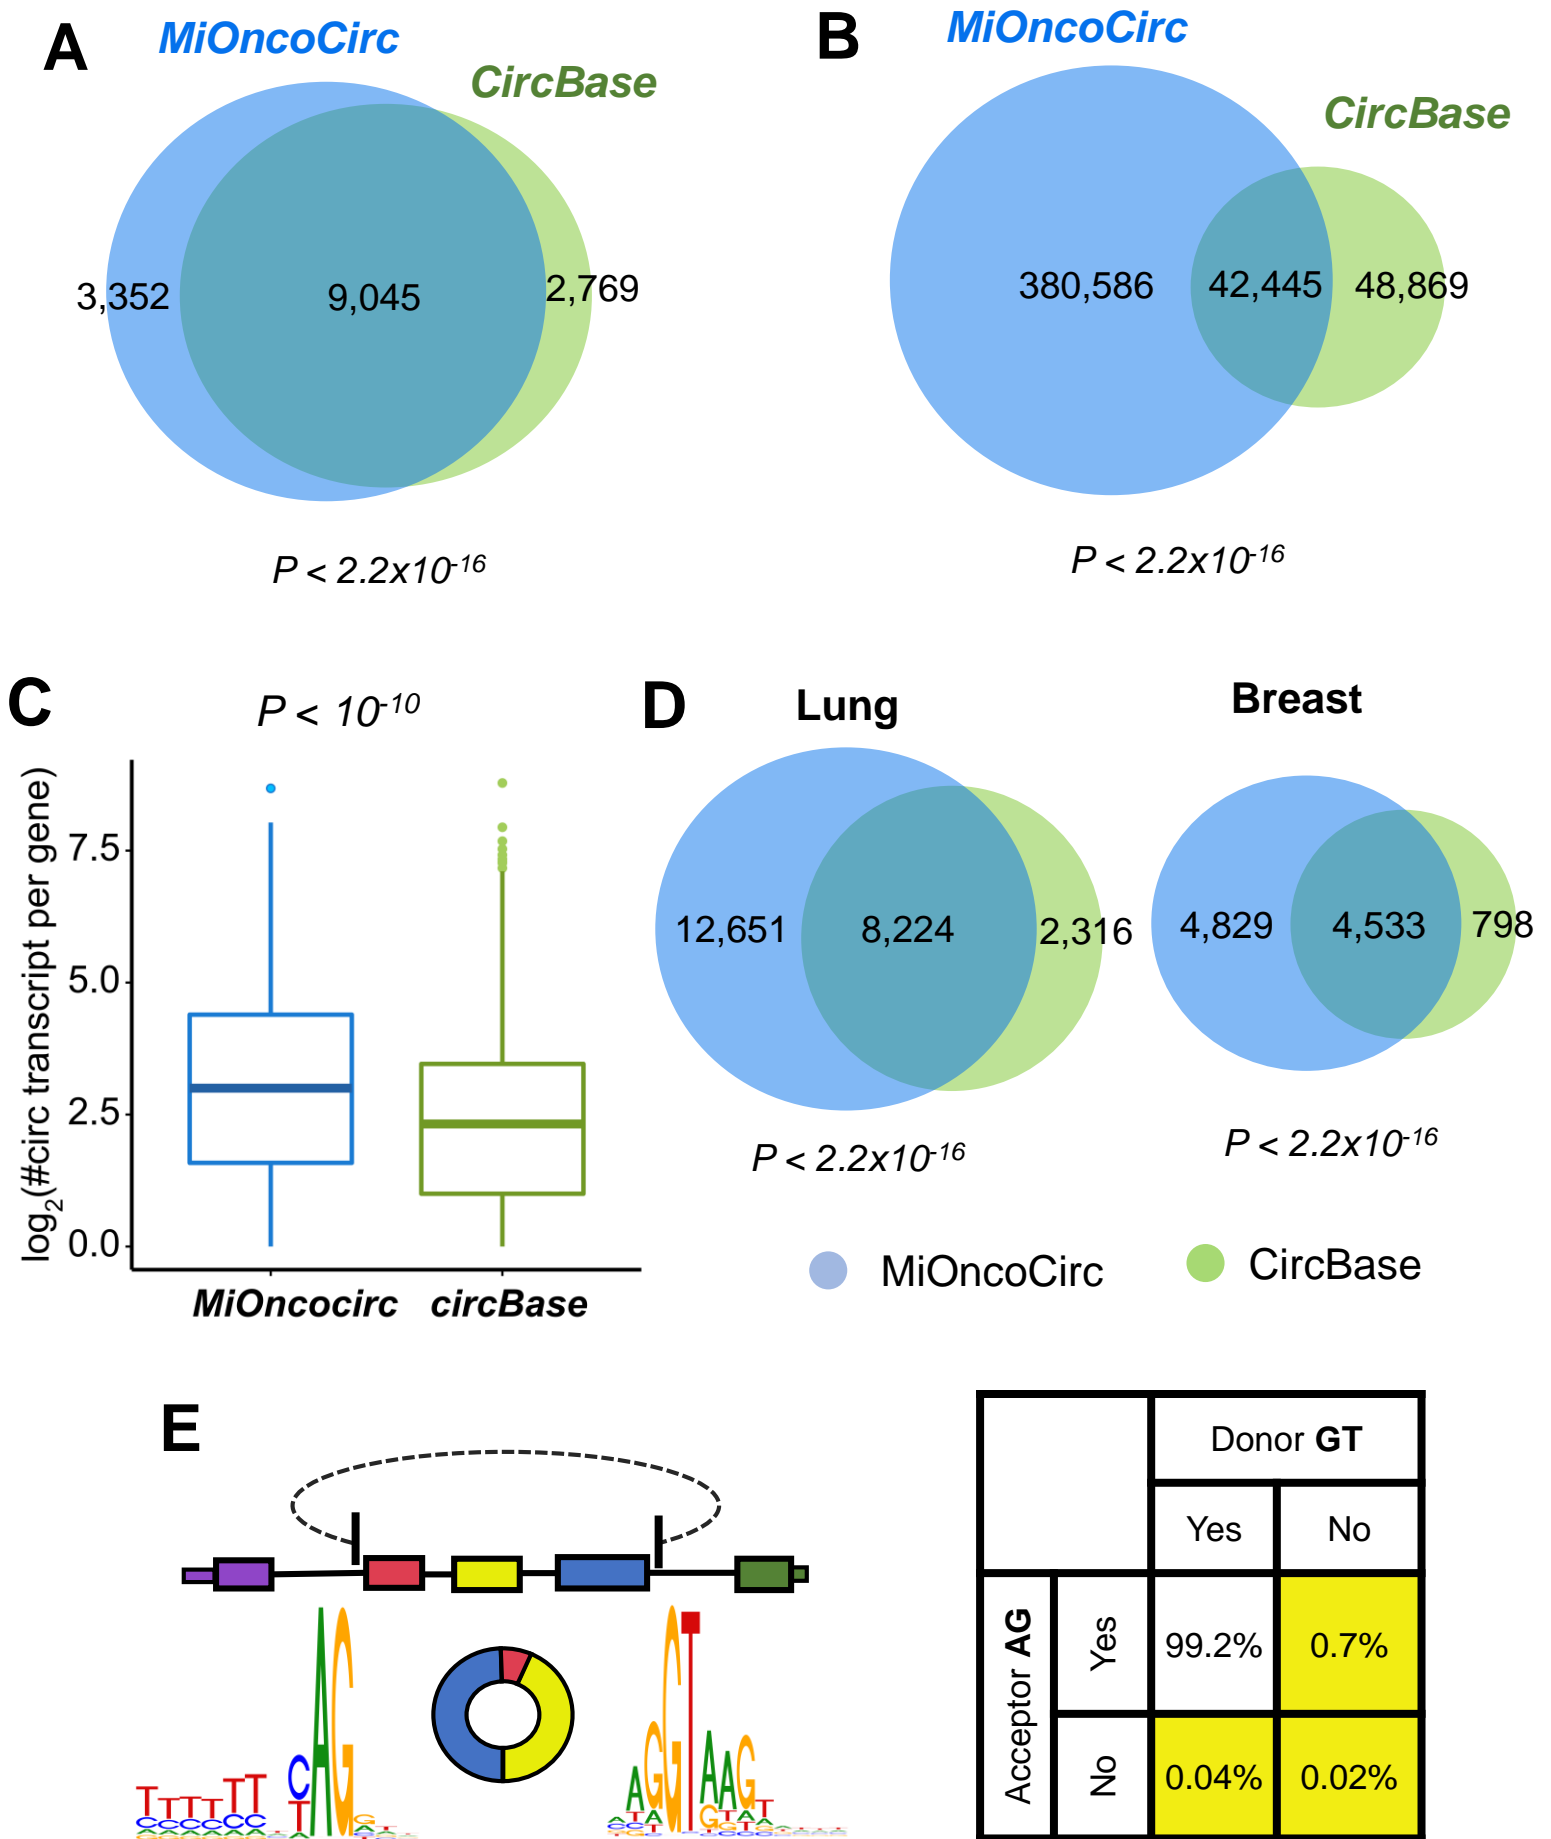

Supplement: NIHMS1036867-supplement-Fig_S1.pdf [file NIHMS1036867-supplement-Fig_S1.pdf]

# Figure S2

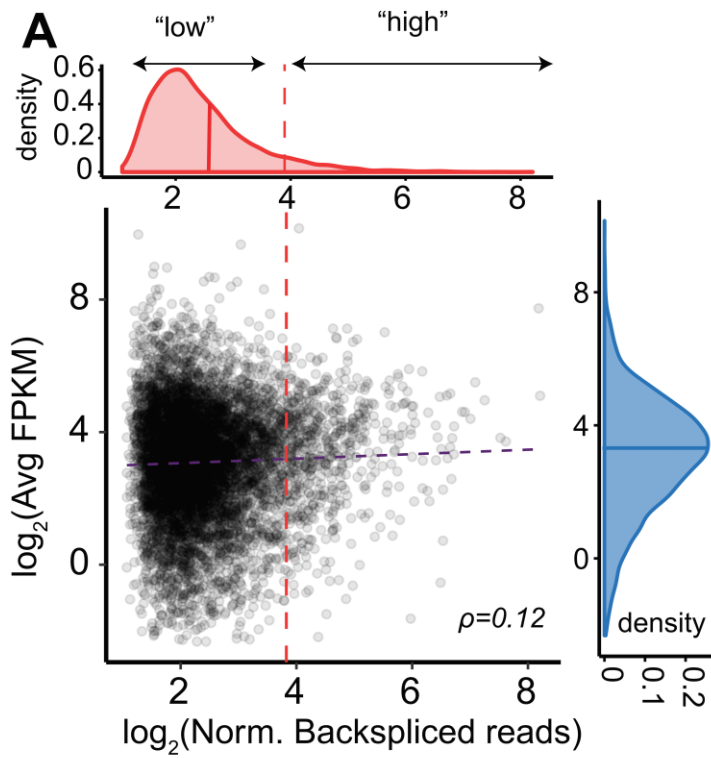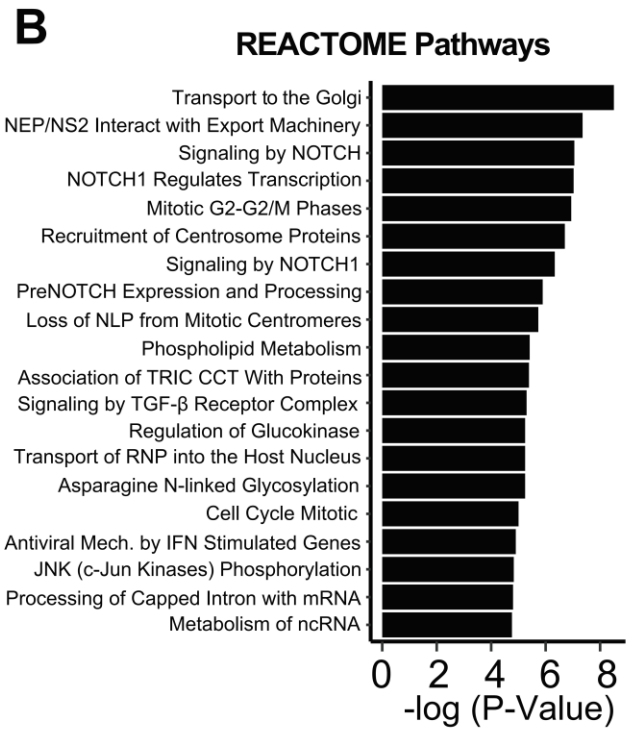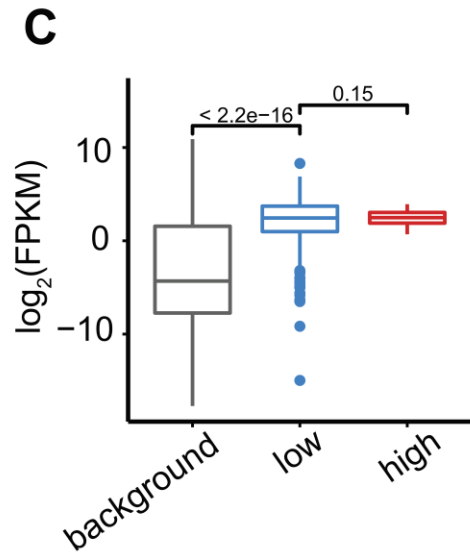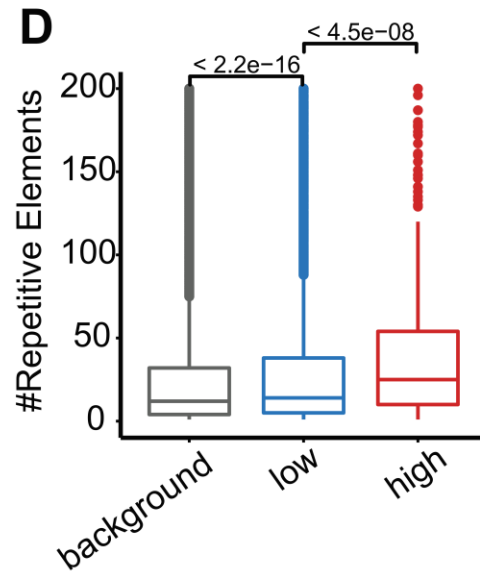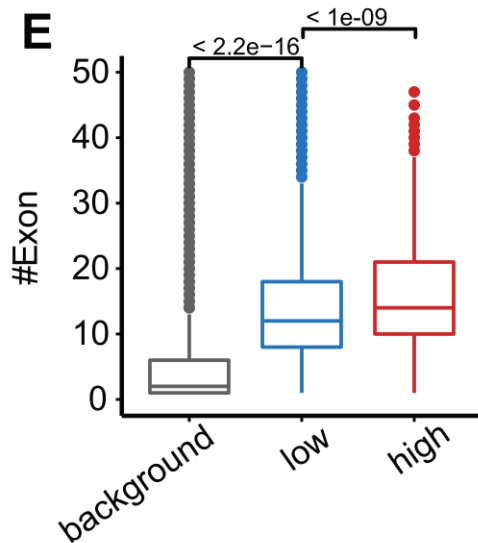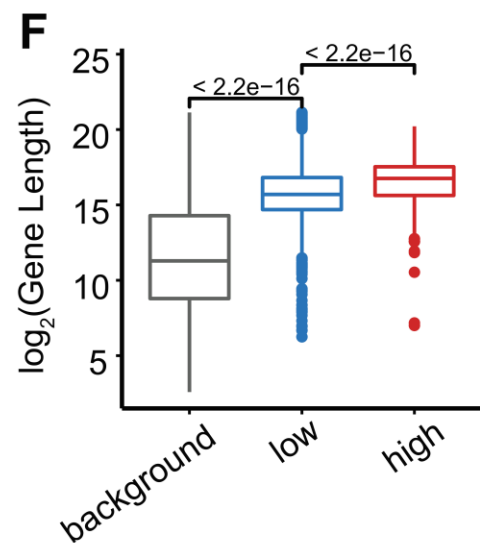

Supplement: NIHMS1036867-supplement-Fig_S2.pdf [file NIHMS1036867-supplement-Fig_S2.pdf]

# Figure S3

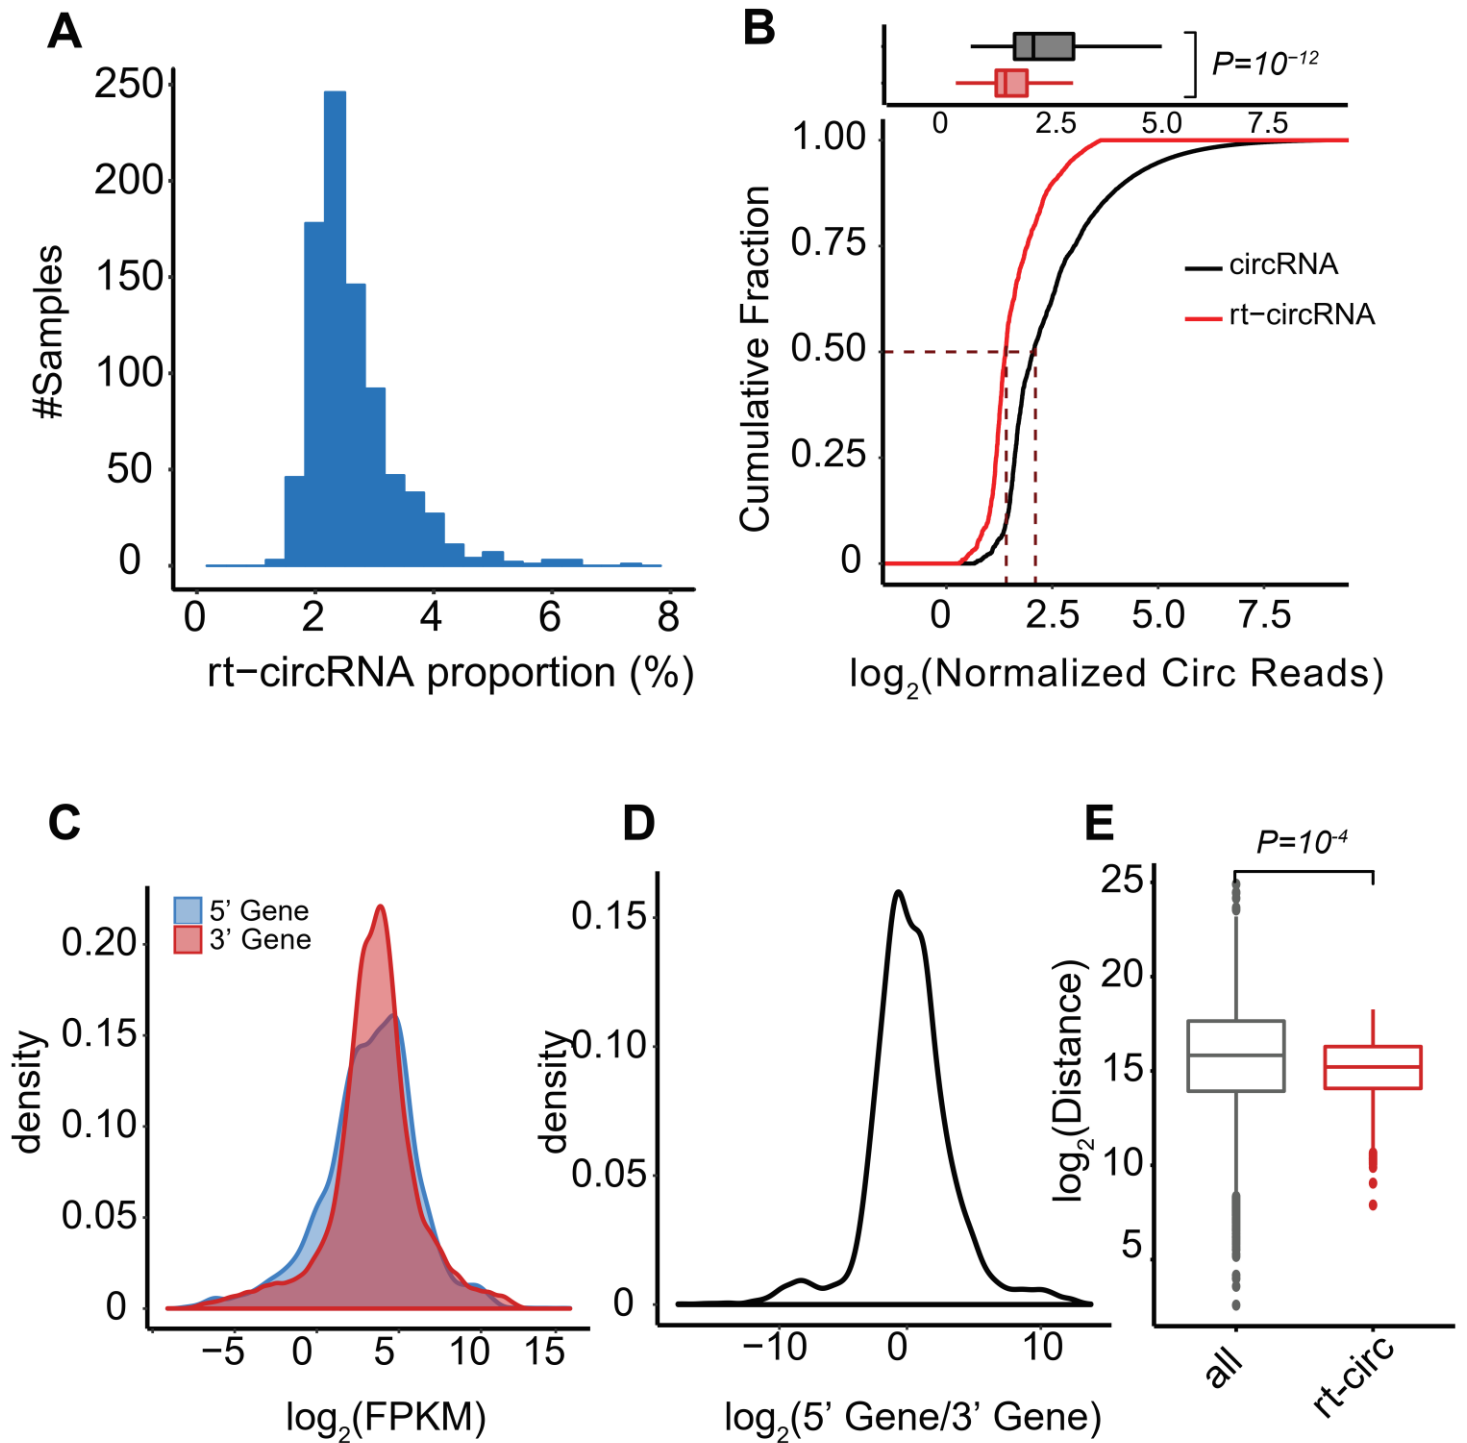

Supplement: NIHMS1036867-supplement-Fig_S3.pdf [file NIHMS1036867-supplement-Fig_S3.pdf]

# Figure S4

## A

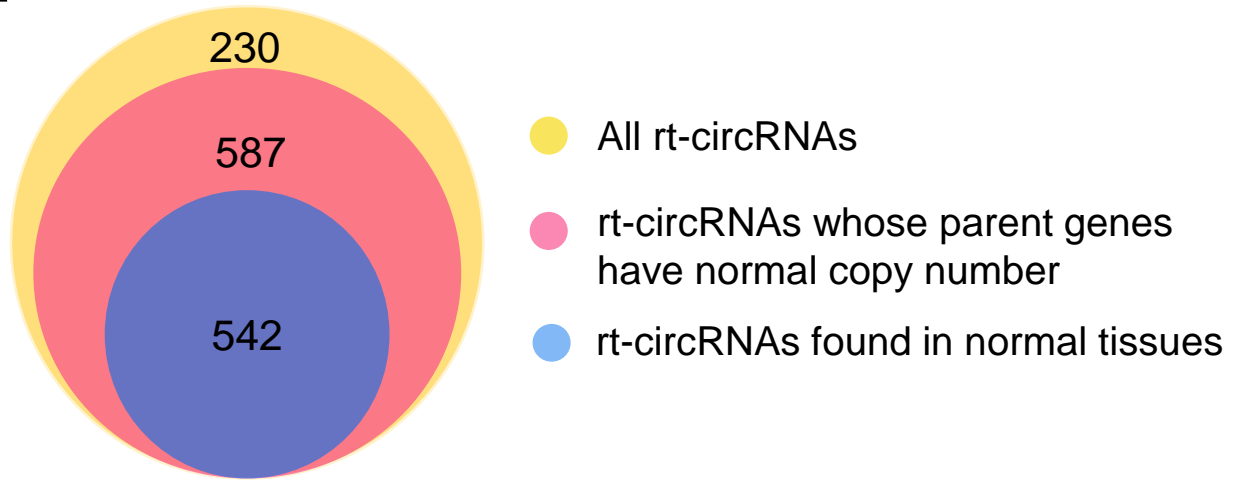

## B

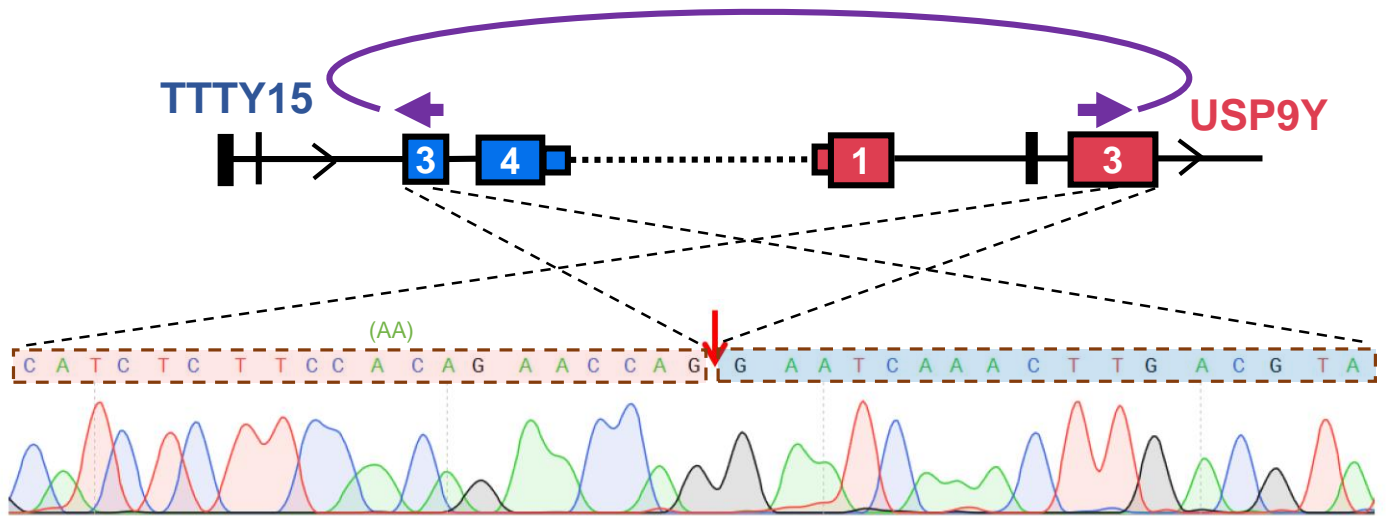

## C

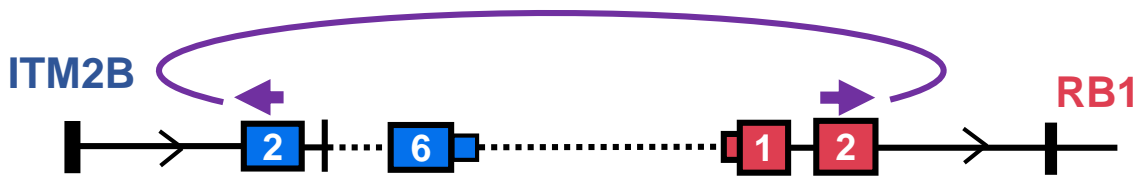

### NSCLC

Coverage Data

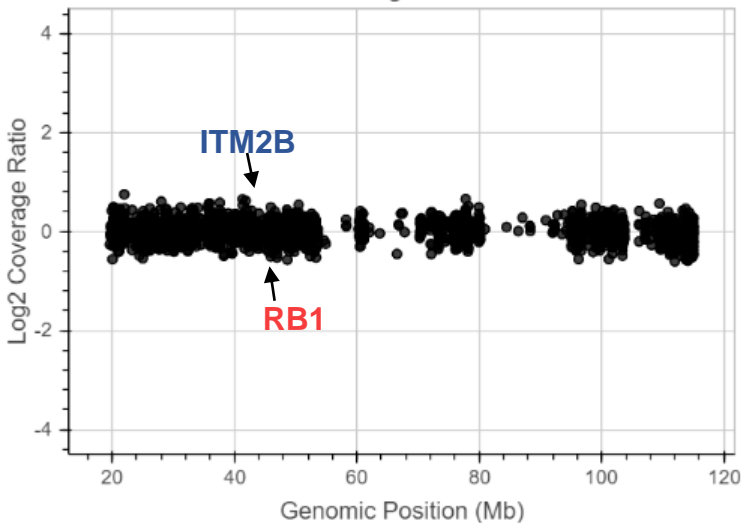

### BLCA

Coverage Data

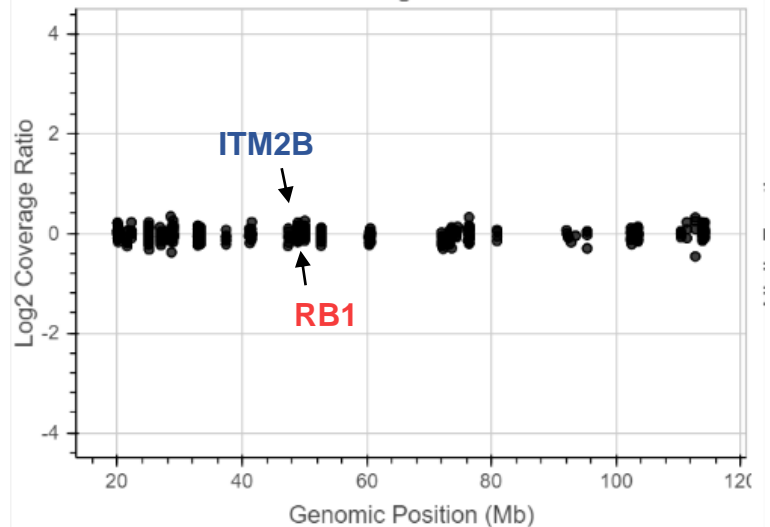

Supplement: NIHMS1036867-supplement-Fig_S4.pdf [file NIHMS1036867-supplement-Fig_S4.pdf]

# Figure S5

**A**

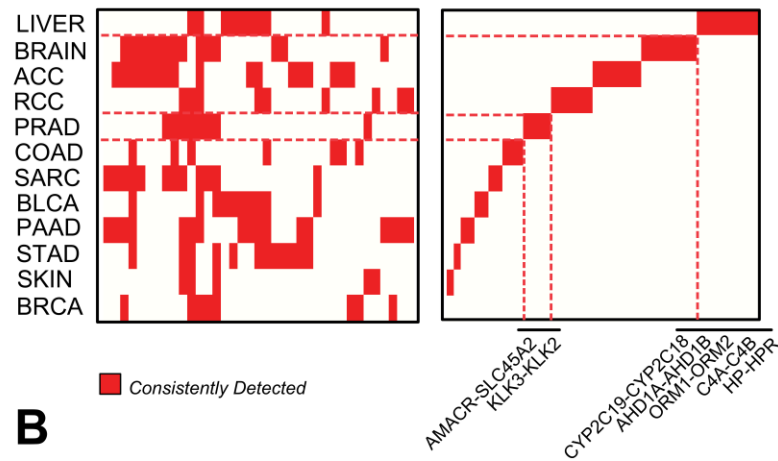

**B**

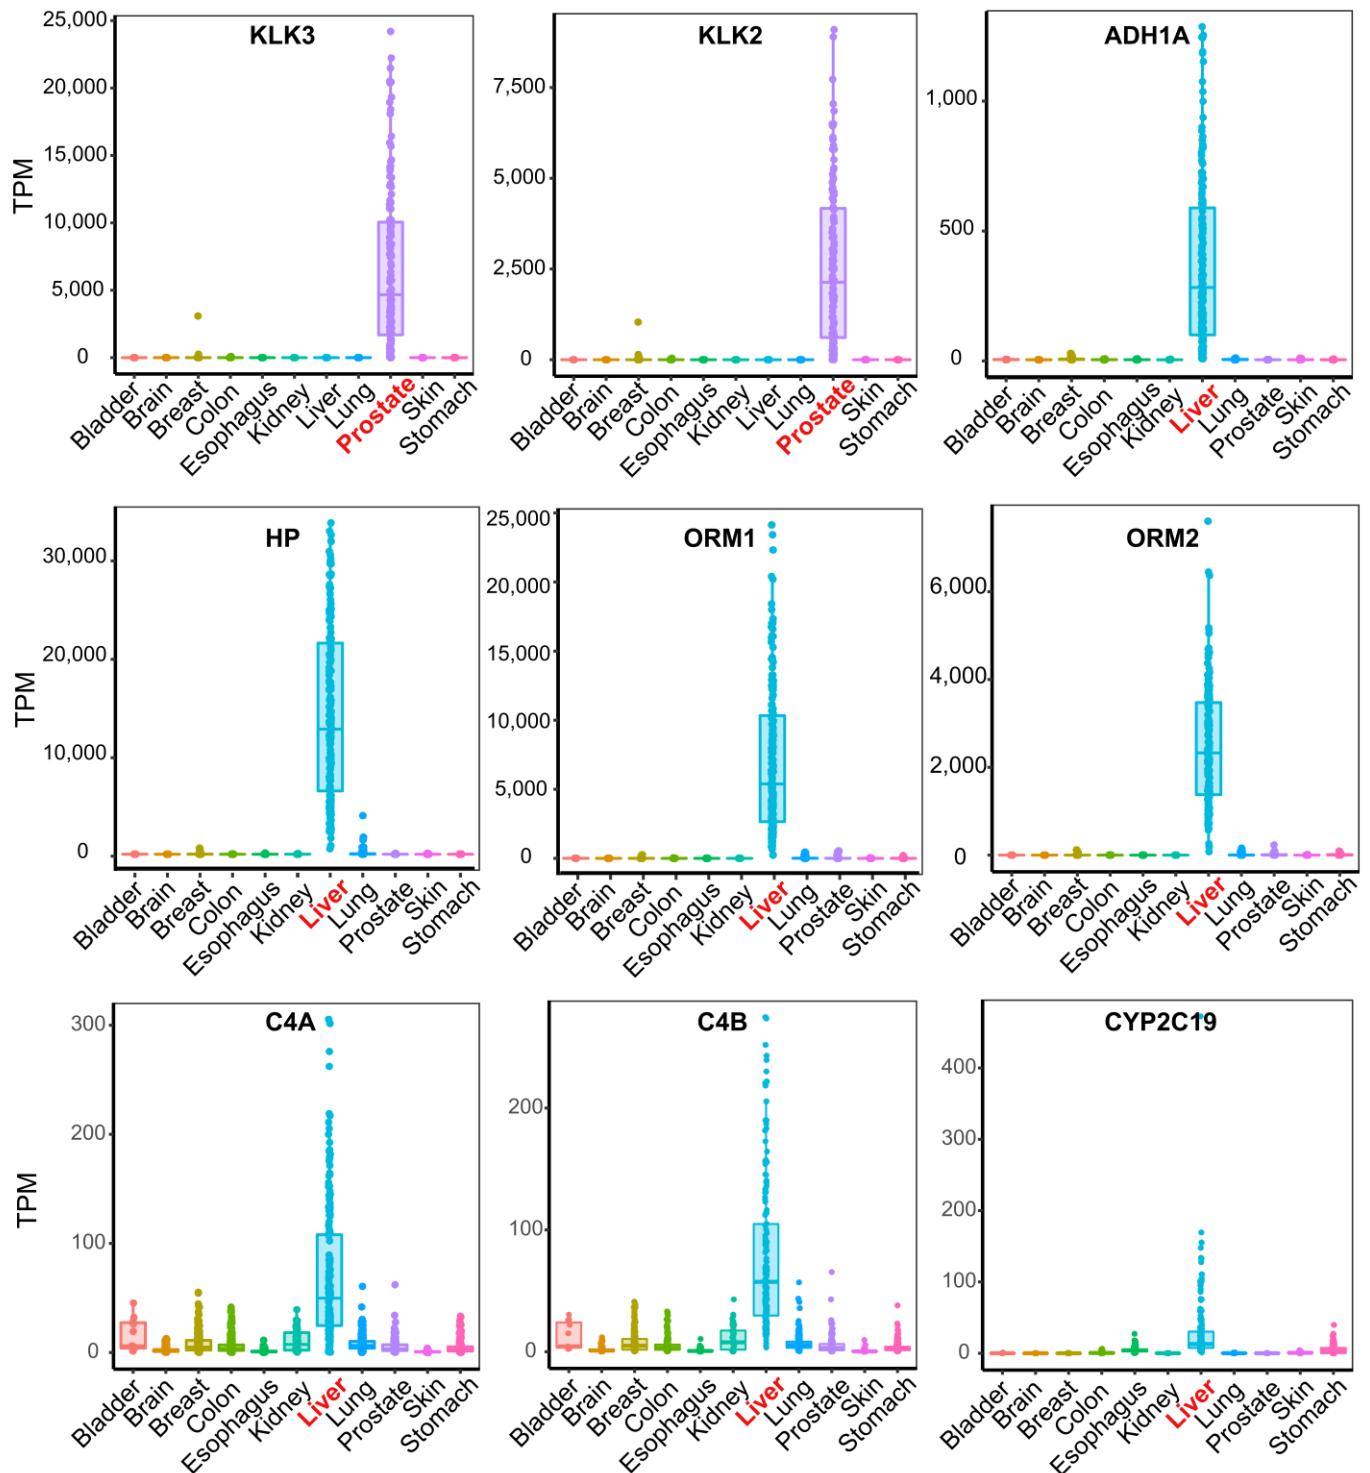

**C**

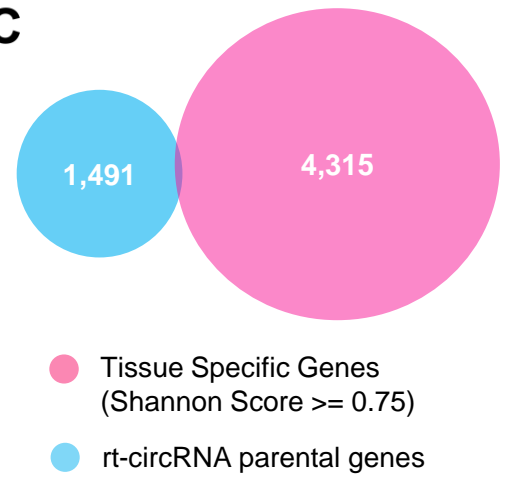

Supplement: NIHMS1036867-supplement-Fig_S5.pdf [file NIHMS1036867-supplement-Fig_S5.pdf]

# Figure S7

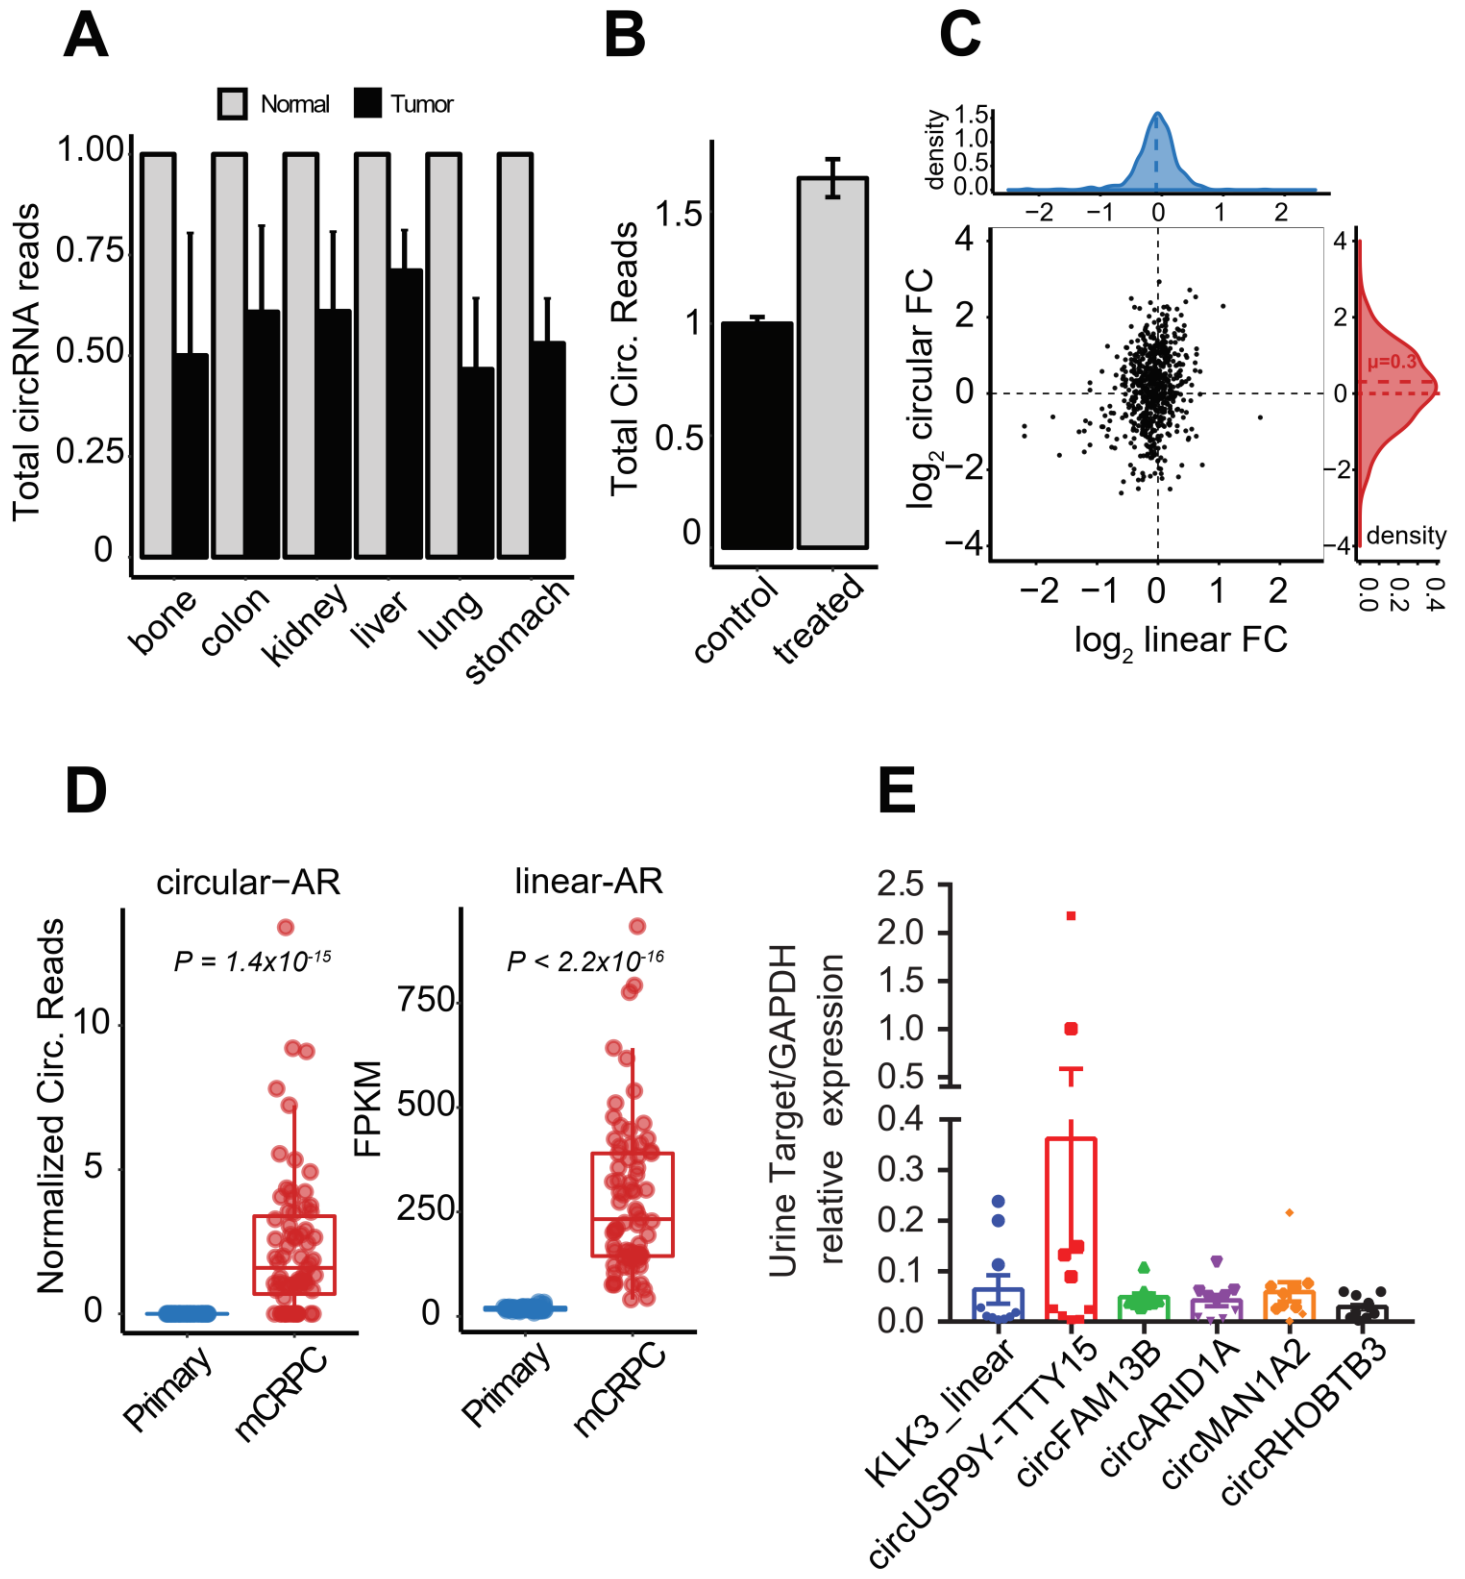

Supplement: NIHMS1036867-supplement-Fig_S7.pdf [file NIHMS1036867-supplement-Fig_S7.pdf]
